# Supplementary material for: Non-precious cobalt–bismuth binary oxide as a superior catalyst for the highly selective aerobic oxidation of 5-hydroxymethylfurfural to 2,5-furandicarboxylic acid in aqueous solvent
Source: Royal Society of Chemistry journal article supplement (doi:10.1039/d3nj05705d), 2024-01-01
Supplement: d3nj05705d1.pdf [file d3nj05705d1.pdf]

## Supplemental Information

**Non-precious cobalt-bismuth binary oxide as a superior catalyst for the highly  
selective aerobic oxidation of 5-hydroxymethylfurfural to 2,5-furandicarboxylic acid  
in aqueous solvent**

Qian Zhang <sup>a</sup>, Aicheng Chen <sup>\* a</sup>, Weixing Pan <sup>a</sup>, and Hu Zhu <sup>\* a</sup>

<sup>a</sup> Fujian Provincial University Engineering Research Center of Industrial Biocatalysis,  
Fujian Provincial Key Laboratory of Advanced Materials Oriented Chemical  
Engineering, College of Chemistry and Materials Science, Fujian Normal University,  
Fuzhou 350007, P.R.China

Corresponding authors: Aicheng Chen, [chenaicheng@fjnu.edu.cn](mailto:chenaicheng@fjnu.edu.cn); Hu Zhu,  
[zhuhu@fjnu.edu.cn](mailto:zhuhu@fjnu.edu.cn)

**Table S1** Comparison on catalytic performances of cheap metal oxide catalysts for the aerobic oxidation of HMF to

| FDCA in water                                        |                        |                                           |               |            |          |           |                |           |
|------------------------------------------------------|------------------------|-------------------------------------------|---------------|------------|----------|-----------|----------------|-----------|
| Catalyst                                             | Oxidant                | Additive                                  |               | Temp. (°C) | Time (h) | Conv. (%) | FDCA Yield (%) | Ref.      |
|                                                      |                        | Dosage                                    | Concentration |            |          |           |                |           |
| CoBi-12                                              | 0.6 MPa O <sub>2</sub> | 2 equiv. NaOH                             | 0.013 M       | 110        | 3        | 100       | 98.23          | This work |
| Ce <sub>0.5</sub> Bi <sub>0.5</sub> O <sub>2-6</sub> | 1 MPa O <sub>2</sub>   | 4 equiv. NaOH                             | 0.60 M        | 65         | 1        | 100       | 8              | S1        |
| amor-MnO <sub>2</sub>                                | 1 MPa                  | 3 equiv. NaHCO <sub>3</sub>               | 0.12 M        | 130        | 3        | 100       | 98             | S2        |
| CoCe-15                                              | 0.6 MPa O <sub>2</sub> | 4 equiv. NaOH                             | 0.027 M       | 130        | 4        | 100       | 77.4           | S3        |
| Co-Mn-0.25                                           | 1 MPa O <sub>2</sub>   | 2 equiv. NaHCO <sub>3</sub>               | 0.10 M        | 120        | 5        | 99        | 95.2           | S4        |
| MnO <sub>x</sub> -CeO <sub>2</sub>                   | 2.0 MPa O <sub>2</sub> | 2 equiv. KHCO <sub>3</sub>                | 0.20 M        | 110        | 12       | 98.5      | 88.7           | S5        |
| CuMn <sub>2</sub> O <sub>4</sub>                     | 1MPa O <sub>2</sub>    | 2 equiv. NaHCO <sub>3</sub>               | 0.10 M        | 120        | 18       | 100       | 90.1           | S6        |
| MOF-Mn <sub>2</sub> O <sub>3</sub>                   | 1.4 MPa O <sub>2</sub> | 3 equiv. NaHCO <sub>3</sub>               | 0.15 M        | 100        | 24       | 100       | 99.5           | S7        |
| β-MnO <sub>2</sub> -HS                               | 1 MPa O <sub>2</sub>   | 3 equiv. NaHCO <sub>3</sub>               | 0.12 M        | 100        | 24       | 99        | 86             | S8        |
| MnO <sub>2</sub>                                     | 1 MPa O <sub>2</sub>   | 3 equiv. NaHCO <sub>3</sub>               | 0.12 M        | 100        | 24       | >99       | 91             | S8        |
| Mn <sub>0.75</sub> Fe <sub>0.25</sub>                | 0.8 MPa O <sub>2</sub> | 4 equiv. NaOH                             | 0.40 M        | 90         | 24       | 93        | 29.8           | S9        |
| Activated MnO <sub>2</sub>                           | 1 MPa O <sub>2</sub>   | 3 equiv. NaHCO <sub>3</sub>               | 0.12 M        | 100        | 24       | 99        | 74             | S8        |
| MnO <sub>2</sub>                                     | 1 MPa O <sub>2</sub>   | 3 equiv. NaHCO <sub>3</sub>               | 0.12 M        | 100        | 24       | 99        | 91             | S10       |
| MnCo <sub>2</sub> O <sub>4</sub>                     | 1 MPa O <sub>2</sub>   | 3 equiv. KHCO <sub>3</sub>                | 0.14 M        | 100        | 24       | 99.5      | 70.9           | S11       |
| SrMnO <sub>3</sub>                                   | 1 MPa O <sub>2</sub>   | 3 equiv. NaHCO <sub>3</sub>               | 0.12 M        | 100        | 24       | 99        | 58             | S10       |
| amor-MnO <sub>2</sub>                                | 1 MPa                  | 3 equiv. NaHCO <sub>3</sub>               | 0.12 M        | 100        | 24       | 100       | 92             | S2        |
| Ni-MnO <sub>x</sub>                                  | 0.8 MPa O <sub>2</sub> | 4 equiv. NaHCO <sub>3</sub>               | 0.40 M        | 100        | 28       | 100       | 93.8           | S12       |
| CoO <sub>x</sub> -MC                                 | 0.5 MPa O <sub>2</sub> | 3.6 equiv. K <sub>2</sub> CO <sub>3</sub> | 0.048 M       | 80         | 30       | 98.3      | 95.3           | S13       |

**Table S2** Pore properties for the fresh and recycled CoBi-12

---

| CoBi-12  | BET surface area ( $\text{m}^2 \text{g}^{-1}$ ) | Pore volume ( $\text{cm}^3 \text{g}^{-1}$ ) | Average pore size (nm) |
|----------|-------------------------------------------------|---------------------------------------------|------------------------|
| Fresh    | 44.98                                           | 0.195                                       | 14.74                  |
| Recycled | 40.29                                           | 0.193                                       | 16.14                  |

---

## References :

- S1. Z. Miao, Y. Zhang, X. Pan, T. Wu, B. Zhang, J. Li, T. Yi, Z. Zhang and X. Yang, *Catal. Sci. Technol.*, 2015, **5**, 1314-1322.
- S2. Y. Wen, Y. Zhang, L. He, H. Li, Z. Zhuang and Y. Yu, *ACS Appl. Nano Mater.*, 2022, **5**, 11559-11566.
- S3. A. C. Chen, T. T. Li, Q. Zhang and H. Zhu, *Catal. Sci. Technol.*, 2022, **12**, 2954-2961.
- S4. K. T. V. Rao, J. L. Rogers, S. Souzanchi, L. Dessbesell, M. B. Ray and C. Xu, *ChemSusChem*, 2018, **11**, 3323-3334.
- S5. X. Han, C. Li, X. Liu, Q. Xia and Y. Wang, *Green Chem.*, 2017, **19**, 996-1004.
- S6. X. Wan, N. Tang, Q. Xie, S. Zhao, C. Zhou, Y. Dai and Y. Yang, *Catal. Sci. Technol.*, 2021, **11**, 1497-1509.
- S7. L. Bao, F.Z. Sun, G.Y. Zhang and T.L. Hu, *ChemSusChem*, 2020, **13**, 548-555.
- S8. E. Hayashi, Y. Yamaguchi, K. Kamata, N. Tsunoda, Y. Kumagai, F. Oba and M. Hara, *J. Am. Chem. Soc.*, 2019, **141**, 890-900.
- S9. F. Neațu, R. S. Marin, M. Florea, N. Petrea, O. D. Pavel and V. I. Pârvulescu, *Appl. Catal. B: Environ.*, 2016, **180**, 751-757.
- S10. E. Hayashi, T. Komanoya, K. Kamata and M. Hara, *ChemSusChem*, 2017, **10**, 654-658.
- S11. S. Zhang, X. Sun, Z. Zheng and L. Zhang, *Catal. Commun.*, 2018, **113**, 19-22.
- S12. K. Yu, Y. Liu, D. Lei, Y. Jiang, Y. Wang, Y. Feng, L.L. Lou, S. Liu and W. Zhou, *Catal. Sci. Technol.*, 2018, **8**, 2299-2303.
- S13. X. Liu, M. Zhang and Z. Li, *ACS Sustainable Chem. Eng.*, 2020, **8**, 4801-4808.
